# Supplementary material for: Dietary Black Soldier Fly (Hermetia illucens)—Dipterose-BSF—Enhanced Zebrafish Innate Immunity Gene Expression and Resistance to Edwardsiella tarda Infection
Source: MDPI journal article supplement (doi:10.3390/insects15050326), 2024-05-01

**Table S1.** The RNA-seq summary results of raw reads, clean reads, and values of Q20 and Q30 ( $n = 4$ )

| Sample Name       | Raw Reads         | Clean Reads       | Clean Reads (%) | Q20 (%)      | Q30 (%)      |
|-------------------|-------------------|-------------------|-----------------|--------------|--------------|
| C-ZF1-Liver       | 17,002,570        | 16,286,344        | 95.79           | 95.3         | 85.4         |
| C-ZF2-Liver       | 11,245,170        | 10,786,796        | 95.92           | 95.3         | 85.6         |
| C-ZF3-Liver       | 17,766,634        | 17,712,137        | 99.69           | 98.9         | 96.2         |
| C-ZF4-Liver       | 18,964,911        | 18,903,974        | 99.68           | 98.7         | 95.6         |
| <b>Average</b>    | <b>16,244,821</b> | <b>15,922,313</b> | <b>97.77</b>    | <b>97.05</b> | <b>90.69</b> |
| BSF-ZF1-Liver     | 13,048,085        | 12,572,707        | 96.36           | 95.6         | 86.3         |
| BSF-ZF2-Liver     | 11,471,571        | 11,063,075        | 96.44           | 95.7         | 86.4         |
| BSF-ZF3-Liver     | 17,780,487        | 17,722,270        | 99.67           | 98.8         | 95.8         |
| BSF-ZF4-Liver     | 16,945,367        | 16,889,629        | 99.67           | 98.8         | 96.0         |
| <b>Average</b>    | <b>14,811,378</b> | <b>14,561,920</b> | <b>98.03</b>    | <b>97.22</b> | <b>91.12</b> |
| C-ZF1-Intestine   | 13,794,645        | 13,225,119        | 95.87           | 95.4         | 85.8         |
| C-ZF2-Intestine   | 13,037,556        | 12,488,743        | 95.79           | 95.3         | 85.6         |
| C-ZF3-Intestine   | 17,407,256        | 17,349,635        | 99.67           | 98.8         | 96.1         |
| C-ZF4-Intestine   | 17,559,334        | 17,508,898        | 99.71           | 98.9         | 96.5         |
| <b>Average</b>    | <b>15,449,698</b> | <b>15,143,099</b> | <b>97.76</b>    | <b>97.13</b> | <b>90.98</b> |
| BSF-ZF1-Intestine | 16,424,021        | 15,746,737        | 95.88           | 95.3         | 85.4         |
| BSF-ZF2-Intestine | 13,627,128        | 13,163,224        | 96.60           | 95.9         | 86.8         |
| BSF-ZF3-Intestine | 18,291,754        | 18,233,975        | 99.68           | 98.8         | 96.0         |
| BSF-ZF4-Intestine | 17,179,385        | 17,126,727        | 99.69           | 98.9         | 96.2         |
| <b>Average</b>    | <b>16,380,572</b> | <b>16,067,666</b> | <b>97.96</b>    | <b>97.20</b> | <b>91.11</b> |

C-ZF is zebrafish control group (fed by basal diet); BSF-ZF is the name for treatment group fed by dipterose-BSF contained diet (0.1 µg/g)

**Table S2.** The RNA-seq summary table of clean reads and mapping results ( $n = 4$ )

| Sample Name       | Clean Reads       | Number of unmapped reads to the reference | Number of reads mapped to the reference* | Number of reads mapped to reference (multiple sites) |
|-------------------|-------------------|-------------------------------------------|------------------------------------------|------------------------------------------------------|
| C-ZF1-Liver       | 16,286,344        | 631,910.15 (3.88%)                        | 15,173,986.70 (93.17%)                   | 480,447.15 (2.95%)                                   |
| C-ZF2-Liver       | 10,786,796        | 365,672.38 (3.39%)                        | 9,873,154.38 (91.53%)                    | 547,969.24 (5.08%)                                   |
| C-ZF3-Liver       | 17,712,137        | 425,091.29 (2.4%)                         | 16,732,655.82 (94.47%)                   | 554,389.89 (3.13%)                                   |
| C-ZF4-Liver       | 18,903,974        | 368,627.49 (1.95%)                        | 17,966,336.89 (95.04%)                   | 567,119.22 (3%)                                      |
| <b>Average</b>    | <b>15,922,313</b> | <b>447,825.33 (2.91%)</b>                 | <b>14,936,533.45 (93.55%)</b>            | <b>537,481.37 (3.54%)</b>                            |
| BSF-ZF1-Liver     | 12,572,707        | 442,559.29 (3.52%)                        | 10,992,317.73 (87.43%)                   | 1,137,829.98 (9.05%)                                 |
| BSF-ZF2-Liver     | 11,063,075        | 417,077.93 (3.77%)                        | 10,293,084.98 (93.04%)                   | 351,805.79 (3.18%)                                   |
| BSF-ZF3-Liver     | 17,722,270        | 395,206.62 (2.23%)                        | 16,882,234.40 (95.26%)                   | 444,828.98 (2.51%)                                   |
| BSF-ZF4-Liver     | 16,889,629        | 454,331.02 (2.69%)                        | 15,996,167.63 (94.71%)                   | 439,130.35 (2.60%)                                   |
| <b>Average</b>    | <b>14,561,920</b> | <b>427,293.71 (3.05%)</b>                 | <b>13,540,951.18 (92.61%)</b>            | <b>593,398.77 (4.34%)</b>                            |
| C-ZF1-Intestine   | 13,225,119        | 562,067.56 (4.25%)                        | 12,218,687.44 (92.39%)                   | 444,364.00 (3.36%)                                   |
| C-ZF2-Intestine   | 12,488,743        | 494,554.22 (3.96%)                        | 11,668,232.58 (93.43%)                   | 325,956.19 (2.61%)                                   |
| C-ZF3-Intestine   | 17,349,635        | 421,596.13 (2.43%)                        | 16,513,382.59 (95.18%)                   | 416,391.24 (2.40%)                                   |
| C-ZF4-Intestine   | 17,508,898        | 418,462.66 (2.39%)                        | 16,682,478.01 (95.28%)                   | 409,708.21 (2.34%)                                   |
| <b>Average</b>    | <b>15,143,099</b> | <b>474,170.14 (3.26%)</b>                 | <b>14,270,695.16 (94.07%)</b>            | <b>399,104.91 (2.68%)</b>                            |
| BSF-ZF1-Intestine | 15,746,737        | 672,385.67 (4.27%)                        | 14,428,735.11 (91.63%)                   | 644,041.54 (4.09%)                                   |
| BSF-ZF2-Intestine | 13,163,224        | 541,008.51 (4.11%)                        | 12,085,155.95 (91.81%)                   | 535,743.22 (4.07%)                                   |
| BSF-ZF3-Intestine | 18,233,975        | 475,906.75 (2.61%)                        | 17,243,870.16 (94.57%)                   | 514,198.10 (2.82%)                                   |
| BSF-ZF4-Intestine | 17,126,727        | 385,351.36 (2.25%)                        | 16,371,438.34 (95.59%)                   | 369,937.30 (2.16%)                                   |
| <b>Average</b>    | <b>16,067,666</b> | <b>518,663.07 (3.31%)</b>                 | <b>15,032,299.89 (93.40%)</b>            | <b>515,980.04 (3.29%)</b>                            |

C-ZF is zebrafish control group (fed by basal diet); BSF-ZF is the treatment group fed by dipterose-BSF contained diet (0.1 µg/g). The average percentage number of reads mapped to the reference is 93.41%.

\* The filtered data reads were mapped using STAR (ver. 2.17.11b) to the reference sequence of *Danio rerio* (GRCz11 (GCA\_000002035.4))

Figure S1. MDS plot verifying biases between C-ZF (control group) as blue circle and BSF-ZF (dipterose-BSF dietary inclusion 0.1 µg/g) as green circle

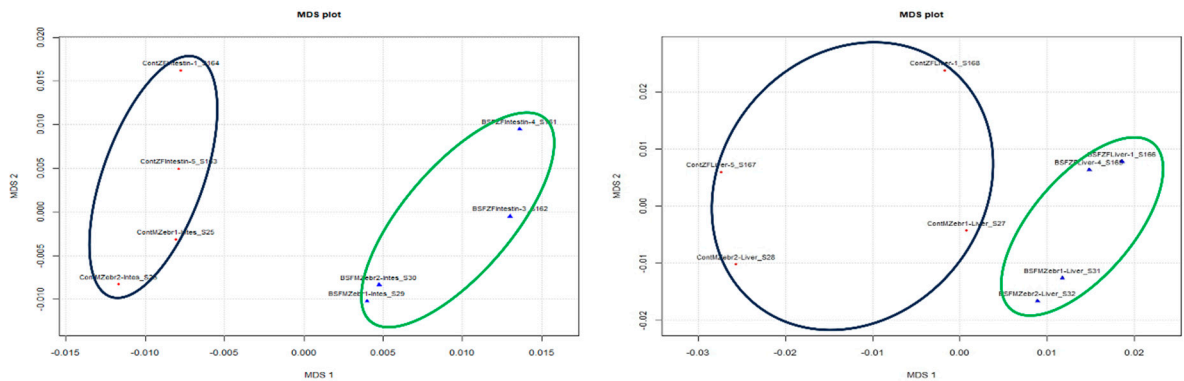

Figure S2. The heatmap display of DEGs obtained from zebrafish liver. Samples are shown in columns (n = 4), while DEGs are in rows.

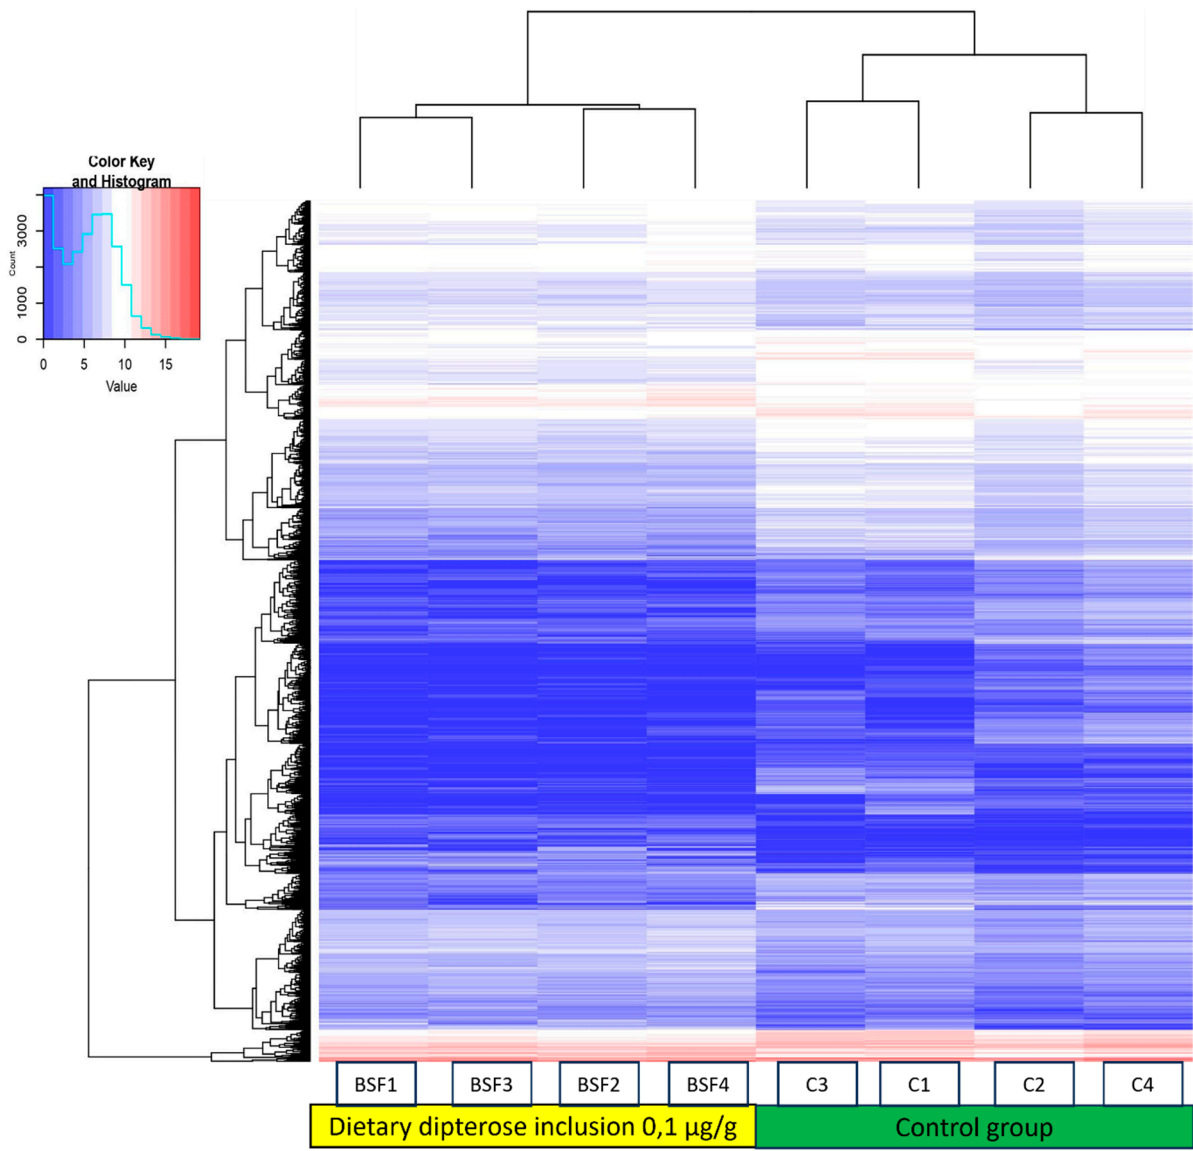

Figure S3. The heatmap display of DEGs was obtained from the zebrafish intestine. Samples are shown in columns ( $n = 4$ ), while DEGs are in rows.

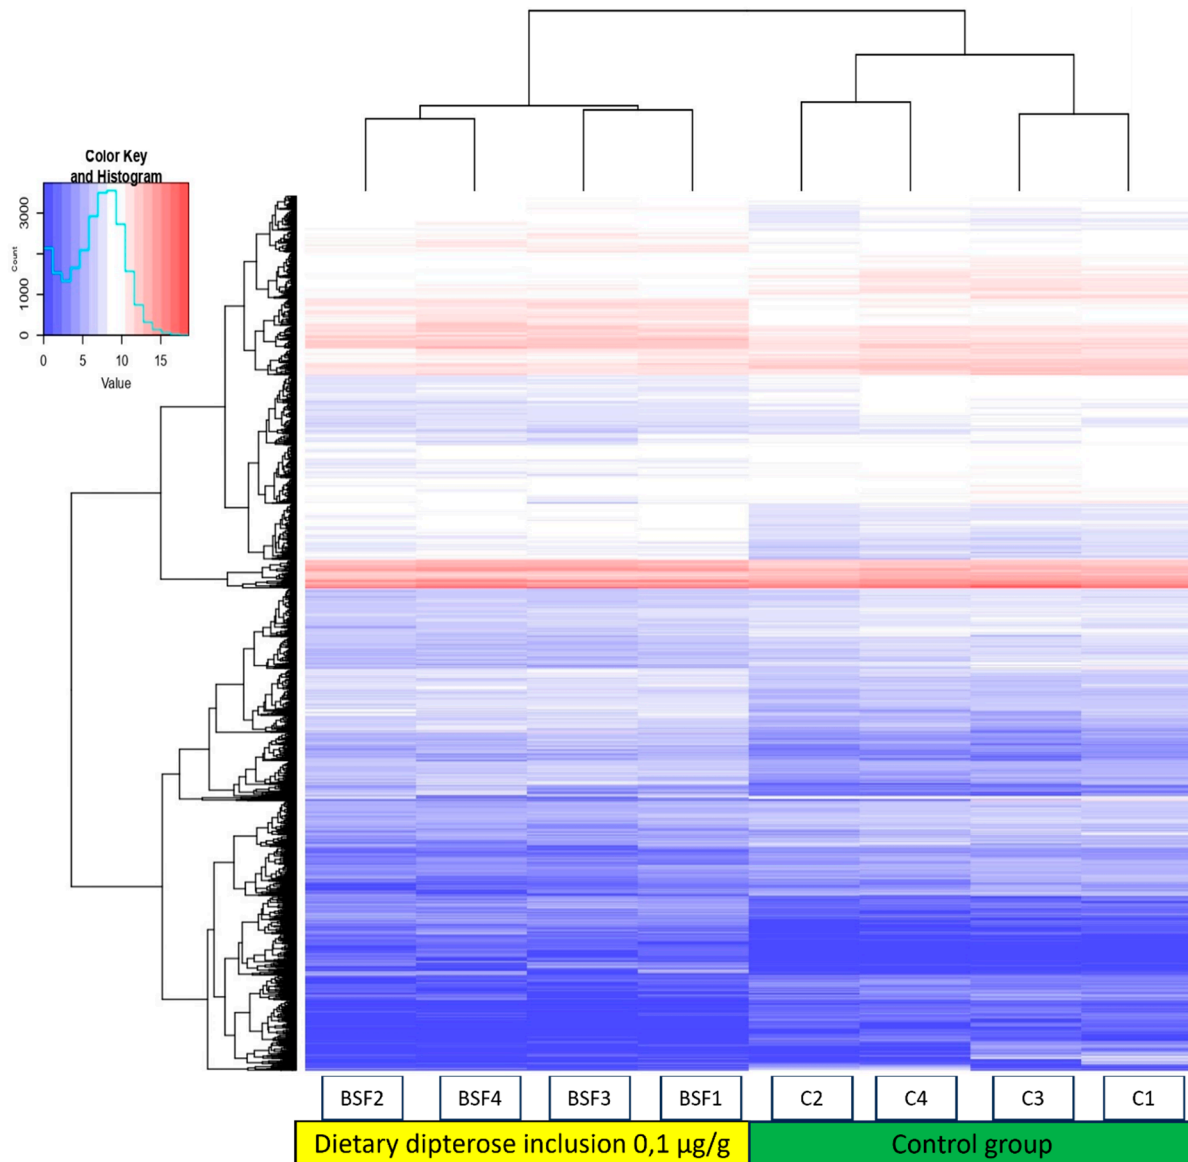

Supplement: s1 [file s1]
